# Supplementary material for: Einfluss der COVID-19-Pandemie auf die ambulante psychotherapeutische Versorgung von Kindern und Jugendlichen
Source: Springer Nature journal article supplement (doi:10.1007/s00278-022-00604-y), 2022-06-27
Supplement: MOESM1 [file 23210100]

## Fragebogen

### 1 Demografische Daten

---

#### Wie alt sind Sie?

Bitte tragen Sie ihr derzeitiges Alter in ganzen Zahlen ein:

Jahre

#### Welchem Geschlecht fühlen Sie sich zugehörig?

Bitte klicken Sie eine der drei Optionen an.

- weiblich  männlich  divers

#### In welchem Bundesland arbeiten Sie?

Bitte klicken Sie eine der nachfolgenden Optionen an.

- Baden-Württemberg
- Nordrhein-Westfalen
- Bayern
- Saarland
- Hessen
- Schleswig-Holstein
- Niedersachsen
- Rheinland-Pfalz
- Hamburg
- Bremen
- Thüringen
- Sachsen-Anhalt
- Sachsen
- Brandenburg
- Mecklenburg-Vorpommern
- Berlin

#### In welchem Siedlungsgebiet arbeiten Sie?

Bitte klicken Sie eine der nachfolgenden Optionen an.

- im ländlichen Raum (bis 4.999 Einwohner)
- in einer kleinen oder mittleren Stadt (5.000 - 99.000 Einwohner)
- in einer kleineren Großstadt (100.000 - 499.000 Einwohner)
- in einer großen Großstadt (ab 500.000 Einwohner)

### 2 Therapeutische Arbeitssituation

---

#### Wie lange arbeiten Sie als Psychotherapeut\*in mit Kindern und Jugendlichen?

Bitte tragen Sie die Arbeitszeit in ganzen Jahren ein.

Jahre
**Wo arbeiten Sie?**

Bitte klicken Sie eine der beiden nachfolgenden Optionen an.

- in einer vertragspsychotherapeutischen Praxis (Kassensitz) oder
- in einer Privatpraxis oder
- in einer anderen Institution der ambulanten psychotherapeutischen Versorgung (z. B. Hochschulambulanz, MVZ)?

**Arbeiten Sie:**

- mit einer Einzelapprobation als Kinder- und Jugendlichenpsychotherapeut\*in oder
- mit einer Doppelapprobation als Psychologische Psychotherapeut\*in und Kinder- und Jugendlichenpsychotherapeut\*in oder
- als psychologische/r Psychotherapeut\*in mit Abrechnungsgenehmigung für Kinder und Jugendliche ?

**Arbeiten Sie:**

- mit einer Teilzulassung (halbem Kassensitz) oder
- mit einer vollen Zulassung (ganzer Kassensitz) oder
- als Angestellte/r ?

**3 Veränderung der Anfragen**

**Bitte schätzen Sie, wie viele der aktuellen Neuanfragen bezüglich eines Erstgesprächs/Therapieplatzes von Ihnen schon einmal behandelte Patient\*innen waren.**

Bewegen Sie bitte den Schieberegler auf die geschätzte Prozentzahl (Ø letzte 6 Monate).

**Bitte schätzen Sie, wie viele der Neuanfragen bezüglich eines Erstgesprächs/Therapieplatzes vor 2 Jahren von Ihnen schon einmal behandelte Patient\*innen waren.**

Bewegen Sie bitte den Schieberegler auf die geschätzte Prozentzahl (Ø vor 2 Jahren).

**Bitte schätzen Sie, wie viele Wochen ein Kind/Jugendlicher derzeit auf einen Erstgesprächstermin bei Ihnen wartet.**

Tragen Sie bitte die durchschnittliche Wartezeit (Ø letzte 6 Monate) in Wochen und ganzen Zahlen ein.

 Wochen

**Bitte schätzen Sie, wie viele Wochen ein Kind/Jugendlicher vor 2 Jahren durchschnittlich auf ein Erstgespräch bei Ihnen wartete.**

Tragen Sie bitte die durchschnittliche Wartezeit (vor 2 Jahren) in Wochen und ganzen Zahlen ein.

 Wochen

**Bitte schätzen Sie, wie viele Wochen ein Kind/Jugendlicher derzeit auf einen Therapieplatz bei Ihnen wartet.**

Tragen Sie bitte die durchschnittliche Wartezeit (Ø letzte 6 Monate) in Wochen und ganzen Zahlen ein.

 Wochen

**Bitte schätzen Sie, wie viele Wochen ein Kind/Jugendlicher durchschnittlich vor 2 Jahren auf einen Therapieplatz bei Ihnen wartete.**

Tragen Sie bitte die durchschnittliche Wartezeit (vor 2 Jahren) in Wochen und ganzen Zahlen ein.

 Wochen
**4 Veränderung der Therapieangebote**

**Bitte schätzen Sie, wie sich nachfolgende psychotherapeutische Leistungen in den letzten 6 Monaten im Vergleich zur Vor-Pandemie-Situation vor 2 Jahren bei Ihnen verändert haben.**

Bitte klicken Sie an, wie sich die jeweilige Leistung verändert hat.

|                                                 | sehr stark verringert | stark verringert      | leicht verringert     | gleich                | leicht erhöht         | stark erhöht          | sehr stark erhöht     |
|-------------------------------------------------|-----------------------|-----------------------|-----------------------|-----------------------|-----------------------|-----------------------|-----------------------|
| ein Erstgespräch/eine Sprechstunde durchgeführt | <input type="radio"/> | <input type="radio"/> | <input type="radio"/> | <input type="radio"/> | <input type="radio"/> | <input type="radio"/> | <input type="radio"/> |
| probatorische Sitzungen durchgeführt            | <input type="radio"/> | <input type="radio"/> | <input type="radio"/> | <input type="radio"/> | <input type="radio"/> | <input type="radio"/> | <input type="radio"/> |

|                                                                              |                       |                       |                       |                       |                       |                       |                       |
|------------------------------------------------------------------------------|-----------------------|-----------------------|-----------------------|-----------------------|-----------------------|-----------------------|-----------------------|
| eine Kurzzeittherapie nach Probatorik begonnen                               | <input type="radio"/> | <input type="radio"/> | <input type="radio"/> | <input type="radio"/> | <input type="radio"/> | <input type="radio"/> | <input type="radio"/> |
| eine Langzeittherapie nach Probatorik begonnen                               | <input type="radio"/> | <input type="radio"/> | <input type="radio"/> | <input type="radio"/> | <input type="radio"/> | <input type="radio"/> | <input type="radio"/> |
| eine Akuttherapie nach Probatorik begonnen                                   | <input type="radio"/> | <input type="radio"/> | <input type="radio"/> | <input type="radio"/> | <input type="radio"/> | <input type="radio"/> | <input type="radio"/> |
| eine psychotherapeutische Behandlung mit einem Kind/Jugendlichen verlängert  | <input type="radio"/> | <input type="radio"/> | <input type="radio"/> | <input type="radio"/> | <input type="radio"/> | <input type="radio"/> | <input type="radio"/> |
| eine psychotherapeutische Behandlung mit einem Kind/Jugendlichen ausgesetzt  | <input type="radio"/> | <input type="radio"/> | <input type="radio"/> | <input type="radio"/> | <input type="radio"/> | <input type="radio"/> | <input type="radio"/> |
| eine psychotherapeutische Behandlung mit einem Kind/Jugendlichen abgebrochen | <input type="radio"/> | <input type="radio"/> | <input type="radio"/> | <input type="radio"/> | <input type="radio"/> | <input type="radio"/> | <input type="radio"/> |

## 5 Veränderung der Therapieformate

**Bitte schätzen Sie, wie sich Ihre Behandlungsformate verändert haben.**

Bitte klicken Sie an, wie sich das jeweilige Behandlungsformat in den letzten 6 Monaten im Vergleich zur Vor-Pandemie-Situation vor 2 Jahren verändert hat.

|                                                      | sehr stark verringert | stark verringert      | leicht verringert     | gleich                | leicht erhöht         | stark erhöht          | sehr stark erhöht     |
|------------------------------------------------------|-----------------------|-----------------------|-----------------------|-----------------------|-----------------------|-----------------------|-----------------------|
| Präsenzbehandlungen mit Kindern/Jugendlichen         | <input type="radio"/> | <input type="radio"/> | <input type="radio"/> | <input type="radio"/> | <input type="radio"/> | <input type="radio"/> | <input type="radio"/> |
| Präsenzbehandlungen mit einer Bezugsperson           | <input type="radio"/> | <input type="radio"/> | <input type="radio"/> | <input type="radio"/> | <input type="radio"/> | <input type="radio"/> | <input type="radio"/> |
| Präsenz-Gruppenbehandlungen mit Kindern/Jugendlichen | <input type="radio"/> | <input type="radio"/> | <input type="radio"/> | <input type="radio"/> | <input type="radio"/> | <input type="radio"/> | <input type="radio"/> |
| Präsenz-Gruppenbehandlungen mit Bezugspersonen       | <input type="radio"/> | <input type="radio"/> | <input type="radio"/> | <input type="radio"/> | <input type="radio"/> | <input type="radio"/> | <input type="radio"/> |
| telefonische Konsultationen mit Kindern/Jugendlichen | <input type="radio"/> | <input type="radio"/> | <input type="radio"/> | <input type="radio"/> | <input type="radio"/> | <input type="radio"/> | <input type="radio"/> |
| telefonische Konsultationen mit Bezugspersonen       | <input type="radio"/> | <input type="radio"/> | <input type="radio"/> | <input type="radio"/> | <input type="radio"/> | <input type="radio"/> | <input type="radio"/> |
| Video-Behandlungen mit Kindern/Jugendlichen          | <input type="radio"/> | <input type="radio"/> | <input type="radio"/> | <input type="radio"/> | <input type="radio"/> | <input type="radio"/> | <input type="radio"/> |
| Video-Behandlungen mit Bezugspersonen                | <input type="radio"/> | <input type="radio"/> | <input type="radio"/> | <input type="radio"/> | <input type="radio"/> | <input type="radio"/> | <input type="radio"/> |

## 6 Verschlechterung der Symptome

**Bitte schätzen Sie, wie hoch der Anteil von Ihnen behandelte(r) Kinder/Jugendlicher in den letzten 6 Monaten war, bei denen eine pandemieassoziierte Verschlechterung bezüglich Symptomanzahl/-schwere festgestellt wurde.**

**Bewegen Sie bitte den Schieberegler auf die geschätzte Prozentzahl.**

**Was waren aus Ihrer Sicht Gründe für die Verschlechterung der Symptomanzahl/-schwere?**

Beim Anklicken sind Mehrfachnennungen möglich.

- Wegfall/Veränderung der Tagesstruktur
- konkrete Angst vor Coronainfektion
- allgemeine Unsicherheit/Bedrohlichkeit/Unvorhersehbarkeit
- eingeschränkte soziale Kontakte
- eingeschränktes Freizeitangebot
- Ausgangssperren/Radiusbeschränkungen
- finanzielle Schwierigkeiten
- lange Wartezeit auf Therapieplatz
- vermehrte Konflikte im Elternhaus
- Überlastung/Überforderung der Eltern
- Home schooling/Wechselunterricht
- Wegfall/Reduktion von Angeboten des Hilfesystems
- Gewalt in der Familie
- Psychische Erkrankung der Eltern
- Psychische Erkrankung von Geschwistern
- andere Gründe

## 7 Veränderungen Störungsbilder

**Bitte schätzen Sie, wie sich die nachfolgenden diagnostizierten Störungsbilder bei Ihnen in den letzten 6 Monaten im Vergleich zur Vor-Pandemie-Situation vor 2 Jahren verändert haben.**

Bitte klicken Sie die Veränderung der jeweiligen Diagnosestellung an.

|                                                   | sehr viel<br>seltener | viel<br>seltener      | seltener              | gleich                | häufiger              | viel<br>häufiger      | sehr viel<br>häufiger |
|---------------------------------------------------|-----------------------|-----------------------|-----------------------|-----------------------|-----------------------|-----------------------|-----------------------|
| Depressionen                                      | <input type="radio"/> | <input type="radio"/> | <input type="radio"/> | <input type="radio"/> | <input type="radio"/> | <input type="radio"/> | <input type="radio"/> |
| Angststörungen                                    | <input type="radio"/> | <input type="radio"/> | <input type="radio"/> | <input type="radio"/> | <input type="radio"/> | <input type="radio"/> | <input type="radio"/> |
| Hyperkinetische Störungen                         | <input type="radio"/> | <input type="radio"/> | <input type="radio"/> | <input type="radio"/> | <input type="radio"/> | <input type="radio"/> | <input type="radio"/> |
| Störungen des Sozialverhaltens                    | <input type="radio"/> | <input type="radio"/> | <input type="radio"/> | <input type="radio"/> | <input type="radio"/> | <input type="radio"/> | <input type="radio"/> |
| Essstörungen                                      | <input type="radio"/> | <input type="radio"/> | <input type="radio"/> | <input type="radio"/> | <input type="radio"/> | <input type="radio"/> | <input type="radio"/> |
| Schlafstörungen                                   | <input type="radio"/> | <input type="radio"/> | <input type="radio"/> | <input type="radio"/> | <input type="radio"/> | <input type="radio"/> | <input type="radio"/> |
| Zwangsstörungen                                   | <input type="radio"/> | <input type="radio"/> | <input type="radio"/> | <input type="radio"/> | <input type="radio"/> | <input type="radio"/> | <input type="radio"/> |
| Akute und Posttraumatische<br>Belastungsstörungen | <input type="radio"/> | <input type="radio"/> | <input type="radio"/> | <input type="radio"/> | <input type="radio"/> | <input type="radio"/> | <input type="radio"/> |
| Anpassungsstörungen                               | <input type="radio"/> | <input type="radio"/> | <input type="radio"/> | <input type="radio"/> | <input type="radio"/> | <input type="radio"/> | <input type="radio"/> |

|                                                                 |                       |                       |                       |                       |                       |                       |                       |
|-----------------------------------------------------------------|-----------------------|-----------------------|-----------------------|-----------------------|-----------------------|-----------------------|-----------------------|
| frühkindliche Regulationsstörungen                              | <input type="radio"/> | <input type="radio"/> | <input type="radio"/> | <input type="radio"/> | <input type="radio"/> | <input type="radio"/> | <input type="radio"/> |
| Psychische und Verhaltensstörungen durch psychotrope Substanzen | <input type="radio"/> | <input type="radio"/> | <input type="radio"/> | <input type="radio"/> | <input type="radio"/> | <input type="radio"/> | <input type="radio"/> |
| Abhängiger Mediengebrauch (PC, TV, Handy etc.)                  | <input type="radio"/> | <input type="radio"/> | <input type="radio"/> | <input type="radio"/> | <input type="radio"/> | <input type="radio"/> | <input type="radio"/> |
| Schulabsentismus                                                | <input type="radio"/> | <input type="radio"/> | <input type="radio"/> | <input type="radio"/> | <input type="radio"/> | <input type="radio"/> | <input type="radio"/> |
| bisher ungenanntes Störungsbild, was sich veränderte            | <input type="radio"/> | <input type="radio"/> | <input type="radio"/> | <input type="radio"/> | <input type="radio"/> | <input type="radio"/> | <input type="radio"/> |
| <input type="text"/>                                            |                       |                       |                       |                       |                       |                       |                       |

## 8 Zusammenarbeit interdisziplinär

Bitte schätzen Sie die Zusammenarbeit im interdisziplinären Netzwerk in den letzten 6 Monaten im Vergleich zur Vor-Corona-Pandemie-Situation vor 2 Jahren ein.

Bitte klicken Sie an, wie sich die jeweilige Zusammenarbeit verändert hat.

|                                                                                          | sehr stark verringert | stark verringert      | leicht verringert     | gleich                | leicht erhöht         | stark erhöht          | sehr stark erhöht     |
|------------------------------------------------------------------------------------------|-----------------------|-----------------------|-----------------------|-----------------------|-----------------------|-----------------------|-----------------------|
| mit anderen niedergelassenen Therapeut*innen (z.B. Austausch, Intervention, Supervision) | <input type="radio"/> | <input type="radio"/> | <input type="radio"/> | <input type="radio"/> | <input type="radio"/> | <input type="radio"/> | <input type="radio"/> |
| mit Kliniken für Kinder- und Jugendpsychiatrie/Psychosomatik                             | <input type="radio"/> | <input type="radio"/> | <input type="radio"/> | <input type="radio"/> | <input type="radio"/> | <input type="radio"/> | <input type="radio"/> |
| mit externen Therapeut*innen (Logo-/Ergo-/Physio-/Lerntherapeuten etc.)                  | <input type="radio"/> | <input type="radio"/> | <input type="radio"/> | <input type="radio"/> | <input type="radio"/> | <input type="radio"/> | <input type="radio"/> |
| mit Pädagog*innen (Lehrer*innen, Erzieher*innen, Sozialpädagoge*innen)                   | <input type="radio"/> | <input type="radio"/> | <input type="radio"/> | <input type="radio"/> | <input type="radio"/> | <input type="radio"/> | <input type="radio"/> |
| mit der Jugendhilfe                                                                      | <input type="radio"/> | <input type="radio"/> | <input type="radio"/> | <input type="radio"/> | <input type="radio"/> | <input type="radio"/> | <input type="radio"/> |
| mit den Eltern/-teilen/ Bezugspersonen                                                   | <input type="radio"/> | <input type="radio"/> | <input type="radio"/> | <input type="radio"/> | <input type="radio"/> | <input type="radio"/> | <input type="radio"/> |

## 9 persönliche Situation Therapeut\*innen

Bitte schätzen Sie, wie sich die Anzahl der von Ihnen angebotenen Behandlungsstunden in den letzten 6 Monaten im Vergleich zur Vor-Pandemie-Situation vor 2 Jahren verändert hat.

|                               | sehr stark verringert | stark verringert      | leicht verringert     | gleich                | leicht erhöht         | stark erhöht          | sehr stark erhöht     |
|-------------------------------|-----------------------|-----------------------|-----------------------|-----------------------|-----------------------|-----------------------|-----------------------|
| angebotene Behandlungsstunden | <input type="radio"/> | <input type="radio"/> | <input type="radio"/> | <input type="radio"/> | <input type="radio"/> | <input type="radio"/> | <input type="radio"/> |

Bitte schätzen Sie, in welchem Maß sich die nachfolgenden Faktoren auf die angebotenen Behandlungsstunden auswirken.

Klicken Sie bitte an, in welchem Maß die einzelnen Faktoren die Anzahl der von Ihnen angebotenen Behandlungsstunden in den letzten 6 Monaten beeinflussten.

|                                                    | sehr häufig           | häufig                | selten                | sehr selten           | gar nicht             |
|----------------------------------------------------|-----------------------|-----------------------|-----------------------|-----------------------|-----------------------|
| Infektionsschutzmaßnahmen wie Lüften, Waschen etc. | <input type="radio"/> | <input type="radio"/> | <input type="radio"/> | <input type="radio"/> | <input type="radio"/> |
| Home schooling/Wechselunterricht                   | <input type="radio"/> | <input type="radio"/> | <input type="radio"/> | <input type="radio"/> | <input type="radio"/> |

der eigenen Kinder

Care-Arbeit (Kinderbetreuung,

ältere Angehörige, vermehrte

Hausarbeit)

eigene Infektionsängste

erhöhter Aufwand durch neue

Therapieformate

Wegfall Gruppentherapien

behördlich verordnete häusliche

Quarantäne

erhöhtes Anfrageaufkommen

anderer Grund:

## 10 Unerwartetes/Ungenanntes

**Welche unerwarteten bzw. bisher ungenannten Veränderungen haben Sie seit Beginn der Corona-Pandemie als Psychotherapeut\*in mit Kindern/Jugendlichen wahrgenommen?**

Bitte tragen Sie ein, was Ihnen in den letzten 6 Monaten im Vergleich zur Vor-Pandemie-Situation vor 2 Jahren aufgefallen ist. Dies betrifft sowohl Sie als Therapeut\*in als auch ihre Patient\*innen und deren Bezugspersonen sowie das interdisziplinäre Netzwerk.

## 11 Endseite

Wir danken Ihnen für die Teilnahme an dieser Studie und würden uns freuen, wenn Sie den Link der Studie an Kolleg\*innen weiterleiten.  
Mit besten Grüßen aus Leipzig und Koblenz-Landau
